# Supplementary material
Source: publisher site journal article supplement (https://www.spandidos-publications.com/7310/downloadSupplementary)

Figure S1. Transfection (knockdown) efficiency of shSHP2 in AC16 cardiomyocytes. \*P<0.05. SHP2, Src homology-2 domain-containing protein tyrosine phosphatase; sh-, short hairpin.

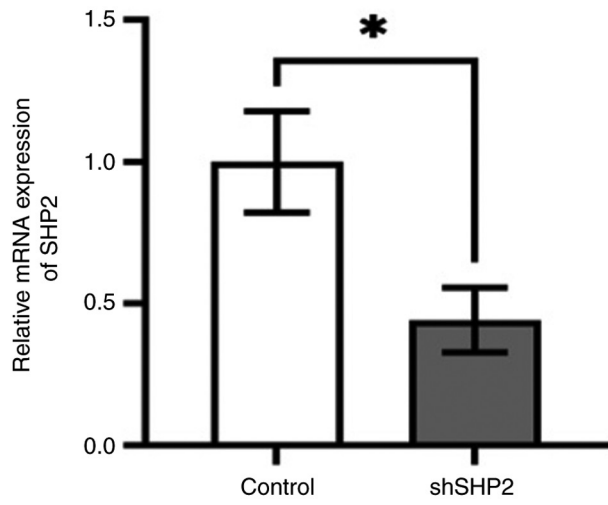

Supplement: Supplementary file 1 [file downloadSupplementary]
